# Supplementary material for: Spatiotemporal analysis of mycolactone distribution in vivo reveals partial diffusion in the central nervous system
Source: PLoS Negl Trop Dis. 2020 Dec 2;14(12):e0008878. doi: 10.1371/journal.pntd.0008878 (PMC7710047; doi:10.1371/journal.pntd.0008878)
Supplement: S2 File — Raw data. (XLS) [file pntd.0008878.s002.xls]

## Sheet: T0
Experiment:
Date
Title
Project
Comments
BBB Model
Type of Filter	12-well filters		Surface (cm2)	1.12
Cells	hCMEC/D3
		Total Vol (mL)	Aliquot (µL)	Ratio
Upper Compartment		0.5	10	50
Lower Compartment		1.5	200	7.5
Amount in the luminal compartment at the onset (= T0)
Measure n°1	Measure n°2	Measure n°3	Mean	Amount
19339	19465	19625	19476.3	973817
Filters without Cells							Filters with cells
Filter without cells n°1							Filter with cells n°1
Time (min)	A.U	+	Amount	% of initial amount			Time (min)	A.U	+	Amount	% of initial amount
10	2869	2869	21517.5	0.022096			10	819	819	6142.5	0.00630766
26	3663	6532	48990	0.0503072			26	1664	2483	18622.5	0.0191232
45	7804	14336	107520	0.110411			45	3693	6176	46320	0.0475654
Sup	13248		662400	0.68021			Sup	14744		737200	0.757021
Amount Recovered / Mass Balance			769920	0.790621			Amount Recovered / Mass Balance			783520	0.804587
Filter without cells n°2							Filter with cells n°2
Time (min)	A.U	+	Amount	% of initial amount			Time (min)	A.U	+	Amount	% of initial amount
10	2352	2352	17640	0.0181143			10	695	695	5212.5	0.00535265
26	4243	6595	49462.5	0.0507924			26	1497	2192	16440	0.016882
45	5979	12574	94305	0.0968406			45	3890	6082	45615	0.0468415
Sup	12629		631450	0.648428			Sup	14469		723450	0.742902
Amount Recovered / Mass Balance			725755	0.745269			Amount Recovered / Mass Balance			769065	0.789743
Filter without cells n°3							Filter with cells n°3
Time (min)	A.U	+	Amount	% of initial amount			Time (min)	A.U	+	Amount	% of initial amount
10	2526	2526	18945	0.0194544			10	755	755	5662.5	0.00581475
26	4871	7397	55477.5	0.0569691			26	1799	2554	19155	0.01967
45	8450	15847	118852	0.122048			45	3954	6508	48810	0.0501224
Sup	13254		662700	0.680518			Sup	14397		719850	0.739205
Amount Recovered / Mass Balance			781552	0.802566			Amount Recovered / Mass Balance			768660	0.789327
	Cumulative % of transport							Cumulative % of transport
	Time (min)	Mean	SD					Time (min)	Mean	SD
	0	0						0	0
	10	0.0198882	0.00202602					10	0.00582502	0.000477585
	26	0.0526896	0.00371413					26	0.0185584	0.00147732
	45	0.109767	0.0126161					45	0.0481764	0.00172368
	Sup	0.669719	0.018439					Sup	0.746376	0.00940266
	Mass Balance	0.779485	0.0302285					Mass Balance	0.794552	0.00869253
Psf Calculation							Endothelial Permeability (Pe) Calculation
Time (min)	Filter n° 1	Filter n° 2	Filter n° 3	Mean	SD		Time (min)	Filter n° 1	Filter n° 2	Filter n° 3	Mean	SD
0	0	0	0	0	0		0	0	0	0	0	0
10	11.2977	9.22424	9.92018	10.1474	1.05521		10	3.17385	2.69073	2.92438	2.92965	0.241603
26	26.486	26.7552	30.2053	27.8155	2.07402		26	9.74802	8.58596	10.0324	9.45544	0.766296
45	62.0573	53.6121	69.5073	61.7256	7.95277		45	24.9704	24.5717	26.3836	25.3086	0.952096
Slope	1.35465	1.19422	1.54409				Slope	0.552692	0.5427	0.586436	0.560609	0.0229174
Psf	1.35465	1.19422	1.54409	1.36432	0.175135		Pst	0.552692	0.5427	0.586436	0.560609	0.0229174
							Psf	1.36432	1.36432	1.36432	1.36432	0
							1/Psf	0.732965	0.732965	0.732965	0.732965	0
							Pse	0.929057	0.901166	1.02854	0.952921	0.0669561
							Pe	0.829515	0.804612	0.918339	0.850822	0.0597823

## Sheet: DMSO 6h
Experiment:
Date
Title
Project
Comments
BBB Model
Type of Filter	12-well filters		Surface (cm2)	1.12
Cells	hCMEC/D3
		Total Vol (mL)	Aliquot (µL)	Ratio
Upper Compartment		0.5	10	50
Lower Compartment		1.5	200	7.5
Amount in the luminal compartment at the onset (= T0)
Measure n°1	Measure n°2	Measure n°3	Mean	Amount
19339	19465	19625	19476.3	973817
Filters without Cells							Filters with cells
Filter without cells n°1							Filter with cells n°1
Time (min)	A.U	+	Amount	% of initial amount			Time (min)	A.U	+	Amount	% of initial amount
10	3383	3383	25372.5	0.0260547			10	1142	1142	8565	0.00879529
25	5411	8794	65955	0.0677284			25	1649	2791	20932.5	0.0214953
45	7840	16634	124755	0.128109			45	2334	5125	38437.5	0.039471
Sup	12556		627800	0.64468			Sup	14159		707950	0.726985
Amount Recovered / Mass Balance			752555	0.772789			Amount Recovered / Mass Balance			746388	0.766456
Filter without cells n°2							Filter with cells n°2
Time (min)	A.U	+	Amount	% of initial amount			Time (min)	A.U	+	Amount	% of initial amount
10	2847	2847	21352.5	0.0219266			10	1083	1083	8122.5	0.00834089
25	5481	8328	62460	0.0641394			25	1707	2790	20925	0.0214876
45	6739	15067	113002	0.116041			45	2050	4840	36300	0.037276
Sup	11902		595100	0.611101			Sup	14622		731100	0.750757
Amount Recovered / Mass Balance			708102	0.727141			Amount Recovered / Mass Balance			767400	0.788033
Filter without cells n°3							Filter with cells n°3
Time (min)	A.U	+	Amount	% of initial amount			Time (min)	A.U	+	Amount	% of initial amount
10	3090	3090	23175	0.0237981			10	1086	1086	8145	0.008364
25	4999	8089	60667.5	0.0622987			25	1828	2914	21855	0.0224426
45	6575	14664	109980	0.112937			45	2701	5615	42112.5	0.0432448
Sup	11226		561300	0.576392			Sup	15622		781100	0.802102
Amount Recovered / Mass Balance			671280	0.689329			Amount Recovered / Mass Balance			823212	0.845346
	Cumulative % of transport							Cumulative % of transport
	Time (min)	Mean	SD					Time (min)	Mean	SD
	0	0						0	0
	10	0.0239265	0.00206703					10	0.00850006	0.000255938
	25	0.0647221	0.00276134					25	0.0218085	0.000549163
	45	0.119029	0.0080154					45	0.0399973	0.00301899
	Sup	0.610724	0.0341456					Sup	0.759948	0.0383925
	Mass Balance	0.729753	0.0417914					Mass Balance	0.799945	0.040772
Psf Calculation							Endothelial Permeability (Pe) Calculation
Time (min)	Filter n° 1	Filter n° 2	Filter n° 3	Mean	SD		Time (min)	Filter n° 1	Filter n° 2	Filter n° 3	Mean	SD
0	0	0	0	0	0		0	0	0	0	0	0
10	13.3759	11.2091	12.1891	12.258	1.08503		10	4.43667	4.20552	4.21727	4.28649	0.130192
25	36.3244	34.2676	33.2188	34.6036	1.5798		25	10.9838	10.9797	11.4789	11.1475	0.287054
45	73.4664	65.637	63.6579	67.5871	5.1869		45	20.5465	19.3597	22.5997	20.8353	1.63922
Slope	1.63872	1.47841	1.4223				Slope	0.455838	0.43203	0.504535	0.464134	0.0369572
Psf	1.63872	1.47841	1.4223	1.51314	0.112309		Pst	0.455838	0.43203	0.504535	0.464134	0.0369572
							Psf	1.51314	1.51314	1.51314	1.51314	0
							1/Psf	0.660876	0.660876	0.660876	0.660876	0
							Pse	0.652365	0.604677	0.756917	0.67132	0.0778701
							Pe	0.582469	0.53989	0.675819	0.599393	0.0695269

## Sheet: Myco 6h
Experiment:
Date
Title
Project
Comments
BBB Model
Type of Filter	12-well filters		Surface (cm2)	1.12
Cells	hCMEC/D3
		Total Vol (mL)	Aliquot (µL)	Ratio
Upper Compartment		0.5	10	50
Lower Compartment		1.5	200	7.5
Amount in the luminal compartment at the onset (= T0)
Measure n°1	Measure n°2	Measure n°3	Mean	Amount
19339	19465	19625	19476.3	973817
Filters without Cells							Filters with cells
Filter without cells n°1							Filter with cells n°1
Time (min)	A.U	+	Amount	% of initial amount			Time (min)	A.U	+	Amount	% of initial amount
10		0	0	/			10	973	973	7297.5	0.00749371
25		0	0	/			25	1824	2797	20977.5	0.0215415
45		0	0	/			45	1663	4460	33450	0.0343494
Sup			0	/			Sup	14831		741550	0.761488
Amount Recovered / Mass Balance			0	/			Amount Recovered / Mass Balance			775000	0.795838
Filter without cells n°2							Filter with cells n°2
Time (min)	A.U	+	Amount	% of initial amount			Time (min)	A.U	+	Amount	% of initial amount
10		0	0	/			10	1075	1075	8062.5	0.00827928
25		0	0	/			25	1834	2909	21817.5	0.0224041
45		0	0	/			45	2283	5192	38940	0.039987
Sup			0	/			Sup	14960		748000	0.768112
Amount Recovered / Mass Balance			0	/			Amount Recovered / Mass Balance			786940	0.808099
Filter without cells n°3							Filter with cells n°3
Time (min)	A.U	+	Amount	% of initial amount			Time (min)	A.U	+	Amount	% of initial amount
10		0	0	/			10	963	963	7222.5	0.00741669
25		0	0	/			25	1818	2781	20857.5	0.0214183
45		0	0	/			45	2100	4881	36607.5	0.0375918
Sup			0	/			Sup	14421		721050	0.740437
Amount Recovered / Mass Balance			0	/			Amount Recovered / Mass Balance			757658	0.778029
	Cumulative % of transport							Cumulative % of transport
	Time (min)	Mean	SD					Time (min)	Mean	SD
	0	0						0	0
	10	#DIV/0!	#DIV/0!					10	0.00772989	0.000477337
	25	#DIV/0!	#DIV/0!					25	0.021788	0.000537132
	45	#DIV/0!	#DIV/0!					45	0.0373094	0.00282939
	Sup	#DIV/0!	#DIV/0!					Sup	0.756679	0.0144505
	Mass Balance	#DIV/0!	#DIV/0!					Mass Balance	0.793988	0.01512
Psf Calculation							Endothelial Permeability (Pe) Calculation
Time (min)	Filter n° 1	Filter n° 2	Filter n° 3	Mean	SD		Time (min)	Filter n° 1	Filter n° 2	Filter n° 3	Mean	SD
0	0	0	0	0	0		0	0	0	0	0	0
10	0	0	0	0	0		10	3.77515	4.1742	3.73606	3.89513	0.242467
25	0	0	0	0	0		25	11.0079	11.4588	10.9435	11.1367	0.280747
45	0	0	0	0	0		45	17.7856	20.8263	19.5301	19.3807	1.52583
Slope	0	0	0				Slope	0.401677	0.466269	0.43966	0.435868	0.0324623
Psf	/	/	/	1.5	0.11		Pst	0.401677	0.466269	0.43966	0.435868	0.0324623
							Psf	1.5	1.5	1.5	1.5	0
							1/Psf	0.666667	0.666667	0.666667	0.666667	0
							Pse	0.548577	0.676581	0.62196	0.615706	0.0642304
							Pe	0.489801	0.60409	0.555322	0.549738	0.0573486

## Sheet: Ac638_6h
Experiment:
Date
Title
Project
Comments
BBB Model
Type of Filter	12-well filters		Surface (cm2)	1.12
Cells	hCMEC/D3
		Total Vol (mL)	Aliquot (µL)	Ratio
Upper Compartment		0.5	10	50
Lower Compartment		1.5	200	7.5
Amount in the luminal compartment at the onset (= T0)
Measure n°1	Measure n°2	Measure n°3	Mean	Amount
19339	19465	19625	19476.3	973817
Filters without Cells							Filters with cells
Filter without cells n°1							Filter with cells n°1
Time (min)	A.U	+	Amount	% of initial amount			Time (min)	A.U	+	Amount	% of initial amount
10		0	0	/			10	953	953	7147.5	0.00733968
25		0	0	/			25	1851	2804	21030	0.0215954
45		0	0	/			45	2973	5777	43327.5	0.0444925
Sup			0	/			Sup	14297		714850	0.73407
Amount Recovered / Mass Balance			0	/			Amount Recovered / Mass Balance			758178	0.778563
Filter without cells n°2							Filter with cells n°2
Time (min)	A.U	+	Amount	% of initial amount			Time (min)	A.U	+	Amount	% of initial amount
10		0	0	/			10	1097	1097	8227.5	0.00844872
25		0	0	/			25	1346	2443	18322.5	0.0188151
45		0	0	/			45	3075	5518	41385	0.0424977
Sup			0	/			Sup	14658		732900	0.752606
Amount Recovered / Mass Balance			0	/			Amount Recovered / Mass Balance			774285	0.795103
Filter without cells n°3							Filter with cells n°3
Time (min)	A.U	+	Amount	% of initial amount			Time (min)	A.U	+	Amount	% of initial amount
10		0	0	/			10	1070	1070	8025	0.00824077
25		0	0	/			25	1287	2357	17677.5	0.0181528
45		0	0	/			45	3463	5820	43650	0.0448236
Sup			0	/			Sup	15471		773550	0.794349
Amount Recovered / Mass Balance			0	/			Amount Recovered / Mass Balance			817200	0.839172
	Cumulative % of transport							Cumulative % of transport
	Time (min)	Mean	SD					Time (min)	Mean	SD
	0	0						0	0
	10	#DIV/0!	#DIV/0!					10	0.00800972	0.000589516
	25	#DIV/0!	#DIV/0!					25	0.0195211	0.00182668
	45	#DIV/0!	#DIV/0!					45	0.0439379	0.0012582
	Sup	#DIV/0!	#DIV/0!					Sup	0.760342	0.0308748
	Mass Balance	#DIV/0!	#DIV/0!					Mass Balance	0.80428	0.0313293
Psf Calculation							Endothelial Permeability (Pe) Calculation
Time (min)	Filter n° 1	Filter n° 2	Filter n° 3	Mean	SD		Time (min)	Filter n° 1	Filter n° 2	Filter n° 3	Mean	SD
0	0	0	0	0	0		0	0	0	0	0	0
10	0	0	0	0	0		10	3.69697	4.26035	4.15462	4.03732	0.299449
25	0	0	0	0	0		25	11.036	9.58797	9.24421	9.95608	0.950946
45	0	0	0	0	0		45	23.2821	22.192	23.4635	22.9792	0.687772
Slope	0	0	0				Slope	0.521968	0.487075	0.514142	0.507728	0.0183096
Psf	/	/	/	1.5	0.11		Pst	0.521968	0.487075	0.514142	0.507728	0.0183096
							Psf	1.5	1.5	1.5	1.5	0
							1/Psf	0.666667	0.666667	0.666667	0.666667	0
							Pse	0.800538	0.721289	0.782276	0.768034	0.0414998
							Pe	0.714766	0.644008	0.698461	0.685745	0.0370534

## Sheet: DMSO 8h
Experiment:
Date
Title
Project
Comments
BBB Model
Type of Filter	12-well filters		Surface (cm2)	1.12
Cells	hCMEC/D3
		Total Vol (mL)	Aliquot (µL)	Ratio
Upper Compartment		0.5	10	50
Lower Compartment		1.5	200	7.5
Amount in the luminal compartment at the onset (= T0)
Measure n°1	Measure n°2	Measure n°3	Mean	Amount
14519	21697	19025	18413.7	920683
Filters without Cells							Filters with cells
Filter without cells n°1							Filter with cells n°1
Time (min)	A.U	+	Amount	% of initial amount			Time (min)	A.U	+	Amount	% of initial amount
10		0	0	/			10	920	920	6900	0.00749443
26		0	0	/			26	1888	2808	21060	0.0228743
45		0	0	/			45	3306	6114	45855	0.0498054
Sup			0	/			Sup	14196		709800	0.770949
Amount Recovered / Mass Balance			0	/			Amount Recovered / Mass Balance			755655	0.820755
Filter without cells n°2							Filter with cells n°2
Time (min)	A.U	+	Amount	% of initial amount			Time (min)	A.U	+	Amount	% of initial amount
10		0	0	/			10	908	908	6810	0.00739668
26		0	0	/			26	1340	2248	16860	0.0183125
45		0	0	/			45	4000	6248	46860	0.050897
Sup			0	/			Sup	14492		724600	0.787024
Amount Recovered / Mass Balance			0	/			Amount Recovered / Mass Balance			771460	0.837921
Filter without cells n°3							Filter with cells n°3
Time (min)	A.U	+	Amount	% of initial amount			Time (min)	A.U	+	Amount	% of initial amount
10		0	0	/			10	999	999	7492.5	0.00813798
26		0	0	/			26	1995	2994	22455	0.0243895
45		0	0	/			45	3960	6954	52155	0.0566481
Sup			0	/			Sup	14848		742400	0.806358
Amount Recovered / Mass Balance			0	/			Amount Recovered / Mass Balance			794555	0.863006
	Cumulative % of transport							Cumulative % of transport
	Time (min)	Mean	SD					Time (min)	Mean	SD
	0	0						0	0
	10	#DIV/0!	#DIV/0!					10	0.00767636	0.000402746
	26	#DIV/0!	#DIV/0!					26	0.0218588	0.00316323
	45	#DIV/0!	#DIV/0!					45	0.0524502	0.00367629
	Sup	#DIV/0!	#DIV/0!					Sup	0.78811	0.0177292
	Mass Balance	#DIV/0!	#DIV/0!					Mass Balance	0.84056	0.0212489
Psf Calculation							Endothelial Permeability (Pe) Calculation
Time (min)	Filter n° 1	Filter n° 2	Filter n° 3	Mean	SD		Time (min)	Filter n° 1	Filter n° 2	Filter n° 3	Mean	SD
0	0	0	0	0	0		0	0	0	0	0	0
10	0	0	0	0	0		10	3.77551	3.7259	4.10237	3.86793	0.204545
26	0	0	0	0	0		26	11.7049	9.32704	12.4996	11.1772	1.6508
45	0	0	0	0	0		45	26.208	26.8132	30.0249	27.682	2.05144
Slope	0	0	0				Slope	0.583461	0.585024	0.665897	0.611461	0.04715
Psf	/	/	/	1.53	0.11		Pst	0.583461	0.585024	0.665897	0.611461	0.04715
							Psf	1.53	1.53	1.53	1.53	0
							1/Psf	0.653595	0.653595	0.653595	0.653595	0
							Pse	0.943115	0.947206	1.17905	1.02312	0.135054
							Pe	0.842067	0.84572	1.05273	0.913504	0.120584

## Sheet: Myco 8h
Experiment:
Date
Title
Project
Comments
BBB Model
Type of Filter	12-well filters		Surface (cm2)	1.12
Cells	hCMEC/D3
		Total Vol (mL)	Aliquot (µL)	Ratio
Upper Compartment		0.5	10	50
Lower Compartment		1.5	200	7.5
Amount in the luminal compartment at the onset (= T0)
Measure n°1	Measure n°2	Measure n°3	Mean	Amount
19339	19465	19625	19476.3	973817
Filters without Cells							Filters with cells
Filter without cells n°1							Filter with cells n°1
Time (min)	A.U	+	Amount	% of initial amount			Time (min)	A.U	+	Amount	% of initial amount
10	3300	3300	24750	0.0254155			10	775	775	5812.5	0.00596878
26	5165	8465	63487.5	0.0651945			26	1361	2136	16020	0.0164507
45	5007	13472	101040	0.103757			45	2157	4293	32197.5	0.0330632
Sup	12947		647350	0.664756			Sup	14810		740500	0.76041
Amount Recovered / Mass Balance			748390	0.768512			Amount Recovered / Mass Balance			772698	0.793473
Filter without cells n°2							Filter with cells n°2
Time (min)	A.U	+	Amount	% of initial amount			Time (min)	A.U	+	Amount	% of initial amount
10	2762	2762	20715	0.021272			10	904	904	6780	0.0069623
26	3672	6434	48255	0.0495524			26	1541	2445	18337.5	0.0188305
45	4377	10811	81082.5	0.0832626			45	2532	4977	37327.5	0.0383311
Sup	12968		648400	0.665834			Sup	14105		705250	0.724212
Amount Recovered / Mass Balance			729482	0.749096			Amount Recovered / Mass Balance			742578	0.762543
Filter without cells n°3							Filter with cells n°3
Time (min)	A.U	+	Amount	% of initial amount			Time (min)	A.U	+	Amount	% of initial amount
10	2829	2829	21217.5	0.021788			10	845	845	6337.5	0.0065079
26	4284	7113	53347.5	0.0547819			26	1355	2200	16500	0.0169436
45	5434	12547	94102.5	0.0966327			45	2936	5136	38520	0.0395557
Sup	13284		664200	0.682059			Sup	14067		703350	0.722261
Amount Recovered / Mass Balance			758302	0.778691			Amount Recovered / Mass Balance			741870	0.761817
	Cumulative % of transport							Cumulative % of transport
	Time (min)	Mean	SD					Time (min)	Mean	SD
	0	0						0	0
	10	0.0228251	0.00225807					10	0.00647966	0.000497358
	26	0.0565096	0.00796287					26	0.0174083	0.00125611
	45	0.0945507	0.0104045					45	0.0369833	0.00344971
	Sup	0.670883	0.00969367					Sup	0.735628	0.0214842
	Mass Balance	0.765433	0.0150358					Mass Balance	0.772611	0.0180707
Psf Calculation							Endothelial Permeability (Pe) Calculation
Time (min)	Filter n° 1	Filter n° 2	Filter n° 3	Mean	SD		Time (min)	Filter n° 1	Filter n° 2	Filter n° 3	Mean	SD
0	0	0	0	0	0		0	0	0	0	0	0
10	13.0391	10.8672	11.1366	11.681	1.18389		10	3.00231	3.50555	3.27526	3.26104	0.251923
26	34.8706	26.068	28.9784	29.9723	4.48471		26	8.36294	9.59597	8.61784	8.85892	0.650906
45	57.8842	45.4125	53.4847	52.2605	6.32537		45	17.0969	19.9295	20.5924	19.2063	1.8566
Slope	1.29183	1.00147	1.18563				Slope	0.379462	0.441525	0.452848	0.424612	0.0395081
Psf	1.29183	1.00147	1.18563	1.15964	0.146911		Pst	0.379462	0.441525	0.452848	0.424612	0.0395081
							Psf	1.15964	1.15964	1.15964	1.15964	0
							1/Psf	0.862333	0.862333	0.862333	0.862333	0
							Pse	0.564024	0.712989	0.742989	0.673334	0.0958462
							Pe	0.503593	0.636597	0.663383	0.601191	0.085577

## Sheet: DMSO 16h
Experiment:
Date
Title
Project
Comments
BBB Model
Type of Filter	12-well filters		Surface (cm2)	1.12
Cells	hCMEC/D3
		Total Vol (mL)	Aliquot (µL)	Ratio
Upper Compartment		0.5	10	50
Lower Compartment		1.5	200	7.5
Amount in the luminal compartment at the onset (= T0)
Measure n°1	Measure n°2	Measure n°3	Mean	Amount
19339	19465	19625	19476.3	973817
Filters without Cells							Filters with cells
Filter without cells n°1							Filter with cells n°1
Time (min)	A.U	+	Amount	% of initial amount			Time (min)	A.U	+	Amount	% of initial amount
10	3300	3300	24750	0.0254155			10	775	775	5812.5	0.00596878
25	5165	8465	63487.5	0.0651945			25	1361	2136	16020	0.0164507
45	5007	13472	101040	0.103757			45	2157	4293	32197.5	0.0330632
Sup	12947		647350	0.664756			Sup	14810		740500	0.76041
Amount Recovered / Mass Balance			748390	0.768512			Amount Recovered / Mass Balance			772698	0.793473
Filter without cells n°2							Filter with cells n°2
Time (min)	A.U	+	Amount	% of initial amount			Time (min)	A.U	+	Amount	% of initial amount
10	2762	2762	20715	0.021272			10	904	904	6780	0.0069623
25	3672	6434	48255	0.0495524			25	1541	2445	18337.5	0.0188305
45	4377	10811	81082.5	0.0832626			45	2532	4977	37327.5	0.0383311
Sup	12968		648400	0.665834			Sup	14105		705250	0.724212
Amount Recovered / Mass Balance			729482	0.749096			Amount Recovered / Mass Balance			742578	0.762543
Filter without cells n°3							Filter with cells n°3
Time (min)	A.U	+	Amount	% of initial amount			Time (min)	A.U	+	Amount	% of initial amount
10	2829	2829	21217.5	0.021788			10	845	845	6337.5	0.0065079
25	4284	7113	53347.5	0.0547819			25	1355	2200	16500	0.0169436
45	5434	12547	94102.5	0.0966327			45	2936	5136	38520	0.0395557
Sup	13284		664200	0.682059			Sup	14067		703350	0.722261
Amount Recovered / Mass Balance			758302	0.778691			Amount Recovered / Mass Balance			741870	0.761817
	Cumulative % of transport							Cumulative % of transport
	Time (min)	Mean	SD					Time (min)	Mean	SD
	0	0						0	0
	10	0.0228251	0.00225807					10	0.00647966	0.000497358
	25	0.0565096	0.00796287					25	0.0174083	0.00125611
	45	0.0945507	0.0104045					45	0.0369833	0.00344971
	Sup	0.670883	0.00969367					Sup	0.735628	0.0214842
	Mass Balance	0.765433	0.0150358					Mass Balance	0.772611	0.0180707
Psf Calculation							Endothelial Permeability (Pe) Calculation
Time (min)	Filter n° 1	Filter n° 2	Filter n° 3	Mean	SD		Time (min)	Filter n° 1	Filter n° 2	Filter n° 3	Mean	SD
0	0	0	0	0	0		0	0	0	0	0	0
10	13.0391	10.8672	11.1366	11.681	1.18389		10	3.00231	3.50555	3.27526	3.26104	0.251923
25	34.8706	26.068	28.9784	29.9723	4.48471		25	8.36294	9.59597	8.61784	8.85892	0.650906
45	57.8842	45.4125	53.4847	52.2605	6.32537		45	17.0969	19.9295	20.5924	19.2063	1.8566
Slope	1.29658	1.00607	1.19186				Slope	0.381925	0.444488	0.456649	0.427687	0.0400952
Psf	1.29658	1.00607	1.19186	1.16484	0.147129		Pst	0.381925	0.444488	0.456649	0.427687	0.0400952
							Psf	1.16484	1.16484	1.16484	1.16484	0
							1/Psf	0.858489	0.858489	0.858489	0.858489	0
							Pse	0.568238	0.718758	0.751102	0.679366	0.0975892
							Pe	0.507355	0.641748	0.670627	0.606577	0.0871333

## Sheet: Myco 16h
Experiment:
Date
Title
Project
Comments
BBB Model
Type of Filter	12-well filters		Surface (cm2)	1.12
Cells	hCMEC/D3
		Total Vol (mL)	Aliquot (µL)	Ratio
Upper Compartment		0.5	10	50
Lower Compartment		1.5	200	7.5
Amount in the luminal compartment at the onset (= T0)
Measure n°1	Measure n°2	Measure n°3	Mean	Amount
19339	19465	19625	19476.3	973817
Filters without Cells							Filters with cells
Filter without cells n°1							Filter with cells n°1
Time (min)	A.U	+	Amount	% of initial amount			Time (min)	A.U	+	Amount	% of initial amount
10	3300	3300	24750	0.0254155			10	682	682	5115	0.00525253
26	5165	8465	63487.5	0.0651945			26	1558	2240	16800	0.0172517
45	5007	13472	101040	0.103757			45	2994	5234	39255	0.0403105
Sup	12947		647350	0.664756			Sup	13833		691650	0.710247
Amount Recovered / Mass Balance			748390	0.768512			Amount Recovered / Mass Balance			730905	0.750557
Filter without cells n°2							Filter with cells n°2
Time (min)	A.U	+	Amount	% of initial amount			Time (min)	A.U	+	Amount	% of initial amount
10	2762	2762	20715	0.021272			10	601	601	4507.5	0.00462869
26	3672	6434	48255	0.0495524			26	1434	2035	15262.5	0.0156729
45	4377	10811	81082.5	0.0832626			45	2250	4285	32137.5	0.0330016
Sup	12968		648400	0.665834			Sup	14364		718200	0.73751
Amount Recovered / Mass Balance			729482	0.749096			Amount Recovered / Mass Balance			750338	0.770512
Filter without cells n°3							Filter with cells n°3
Time (min)	A.U	+	Amount	% of initial amount			Time (min)	A.U	+	Amount	% of initial amount
10	2829	2829	21217.5	0.021788			10	659	659	4942.5	0.00507539
26	4284	7113	53347.5	0.0547819			26	1791	2450	18375	0.0188691
45	5434	12547	94102.5	0.0966327			45	2941	5391	40432.5	0.0415196
Sup	13284		664200	0.682059			Sup	12667		633350	0.650379
Amount Recovered / Mass Balance			758302	0.778691			Amount Recovered / Mass Balance			673782	0.691899
	Cumulative % of transport							Cumulative % of transport
	Time (min)	Mean	SD					Time (min)	Mean	SD
	0	0						0	0
	10	0.0228251	0.00225807					10	0.00498554	0.000321477
	26	0.0565096	0.00796287					26	0.0172645	0.00159813
	45	0.0945507	0.0104045					45	0.0382772	0.00460866
	Sup	0.670883	0.00969367					Sup	0.699379	0.0445708
	Mass Balance	0.765433	0.0150358					Mass Balance	0.737656	0.0408637
Psf Calculation							Endothelial Permeability (Pe) Calculation
Time (min)	Filter n° 1	Filter n° 2	Filter n° 3	Mean	SD		Time (min)	Filter n° 1	Filter n° 2	Filter n° 3	Mean	SD
0	0	0	0	0	0		0	0	0	0	0	0
10	13.0391	10.8672	11.1366	11.681	1.18389		10	2.64013	2.32511	2.55064	2.50529	0.162333
26	34.8706	26.068	28.9784	29.9723	4.48471		26	8.77728	7.96121	9.61597	8.78482	0.827407
45	57.8842	45.4125	53.4847	52.2605	6.32537		45	21.0018	17.0639	21.6591	19.9083	2.4851
Slope	1.29183	1.00147	1.18563				Slope	0.467976	0.38275	0.486935	0.445887	0.0554941
Psf	1.29183	1.00147	1.18563	1.15964	0.146911		Pst	0.467976	0.38275	0.486935	0.445887	0.0554941
							Psf	1.15964	1.15964	1.15964	1.15964	0
							1/Psf	0.862333	0.862333	0.862333	0.862333	0
							Pse	0.784604	0.571318	0.8394	0.731774	0.141634
							Pe	0.700539	0.510105	0.749464	0.653369	0.126459

## Sheet: DMSO 24h
Experiment:
Date
Title
Project
Comments
BBB Model
Type of Filter	12-well filters		Surface (cm2)	1.12
Cells	hCMEC/D3
		Total Vol (mL)	Aliquot (µL)	Ratio
Upper Compartment		0.5	10	50
Lower Compartment		1.5	200	7.5
Amount in the luminal compartment at the onset (= T0)
Measure n°1	Measure n°2	Measure n°3	Mean	Amount
14519	21697	19025	18413.7	920683
Filters without Cells							Filters with cells
Filter without cells n°1							Filter with cells n°1
Time (min)	A.U	+	Amount	% of initial amount			Time (min)	A.U	+	Amount	% of initial amount
10		0	0	/			10	755	755	5662.5	0.00615032
25		0	0	/			25	1286	2041	15307.5	0.0166262
45		0	0	/			45	4148	6189	46417.5	0.0504164
Sup			0	/			Sup	14031		701550	0.761988
Amount Recovered / Mass Balance			0	/			Amount Recovered / Mass Balance			747968	0.812405
Filter without cells n°2							Filter with cells n°2
Time (min)	A.U	+	Amount	% of initial amount			Time (min)	A.U	+	Amount	% of initial amount
10		0	0	/			10	798	798	5985	0.00650061
25		0	0	/			25	959	1757	13177.5	0.0143127
45		0	0	/			45	3684	5441	40807.5	0.0443231
Sup			0	/			Sup	14012		700600	0.760957
Amount Recovered / Mass Balance			0	/			Amount Recovered / Mass Balance			741408	0.80528
Filter without cells n°3							Filter with cells n°3
Time (min)	A.U	+	Amount	% of initial amount			Time (min)	A.U	+	Amount	% of initial amount
10		0	0	/			10	807	807	6052.5	0.00657392
25		0	0	/			25	1268	2075	15562.5	0.0169032
45		0	0	/			45	4428	6503	48772.5	0.0529742
Sup			0	/			Sup	13701		685050	0.744067
Amount Recovered / Mass Balance			0	/			Amount Recovered / Mass Balance			733822	0.797041
	Cumulative % of transport							Cumulative % of transport
	Time (min)	Mean	SD					Time (min)	Mean	SD
	0	0						0	0
	10	#DIV/0!	#DIV/0!					10	0.00640828	0.000226388
	25	#DIV/0!	#DIV/0!					25	0.0159474	0.00142241
	45	#DIV/0!	#DIV/0!					45	0.0492379	0.00444436
	Sup	#DIV/0!	#DIV/0!					Sup	0.755671	0.0100623
	Mass Balance	#DIV/0!	#DIV/0!					Mass Balance	0.804908	0.00768851
Psf Calculation							Endothelial Permeability (Pe) Calculation
Time (min)	Filter n° 1	Filter n° 2	Filter n° 3	Mean	SD		Time (min)	Filter n° 1	Filter n° 2	Filter n° 3	Mean	SD
0	0	0	0	0	0		0	0	0	0	0	0
10	0	0	0	0	0		10	3.09419	3.27157	3.30871	3.22482	0.114645
25	0	0	0	0	0		25	8.45367	7.26028	8.59692	8.10362	0.733858
45	0	0	0	0	0		45	26.5466	23.1894	27.9687	25.9016	2.45411
Slope	0	0	0				Slope	0.586948	0.507234	0.616623	0.570268	0.0565695
Psf	/	/	/	1.16	0.15		Pst	0.586948	0.507234	0.616623	0.570268	0.0565695
							Psf	1.16	1.16	1.16	1.16	0
							1/Psf	0.862069	0.862069	0.862069	0.862069	0
							Pse	1.18813	0.901383	1.31636	1.13529	0.212476
							Pe	1.06083	0.804806	1.17532	1.01365	0.189711

## Sheet: Myco 24h
Experiment:
Date
Title
Project
Comments
BBB Model
Type of Filter	12-well filters		Surface (cm2)	1.12
Cells	hCMEC/D3
		Total Vol (mL)	Aliquot (µL)	Ratio
Upper Compartment		0.5	10	50
Lower Compartment		1.5	200	7.5
Amount in the luminal compartment at the onset (= T0)
Measure n°1	Measure n°2	Measure n°3	Mean	Amount
14519	21697	19025	18413.7	920683
Filters without Cells							Filters with cells
Filter without cells n°1							Filter with cells n°1
Time (min)	A.U	+	Amount	% of initial amount			Time (min)	A.U	+	Amount	% of initial amount
10		0	0	/			10	959	959	7192.5	0.00781213
25		0	0	/			25	2064	3023	22672.5	0.0246257
45		0	0	/			45	2597	5620	42150	0.0457812
Sup			0	/			Sup	12602		630100	0.684383
Amount Recovered / Mass Balance			0	/			Amount Recovered / Mass Balance			672250	0.730164
Filter without cells n°2							Filter with cells n°2
Time (min)	A.U	+	Amount	% of initial amount			Time (min)	A.U	+	Amount	% of initial amount
10		0	0	/			10	843	843	6322.5	0.00686718
25		0	0	/			25	2144	2987	22402.5	0.0243325
45		0	0	/			45	2934	5921	44407.5	0.0482332
Sup			0	/			Sup	13480		674000	0.732065
Amount Recovered / Mass Balance			0	/			Amount Recovered / Mass Balance			718408	0.780298
Filter without cells n°3							Filter with cells n°3
Time (min)	A.U	+	Amount	% of initial amount			Time (min)	A.U	+	Amount	% of initial amount
10		0	0	/			10	815	815	6112.5	0.00663909
25		0	0	/			25	1638	2453	18397.5	0.0199824
45		0	0	/			45	2286	4739	35542.5	0.0386045
Sup			0	/			Sup	11685		584250	0.634583
Amount Recovered / Mass Balance			0	/			Amount Recovered / Mass Balance			619792	0.673187
	Cumulative % of transport							Cumulative % of transport
	Time (min)	Mean	SD					Time (min)	Mean	SD
	0	0						0	0
	10	#DIV/0!	#DIV/0!					10	0.00710613	0.000621957
	25	#DIV/0!	#DIV/0!					25	0.0229802	0.00260029
	45	#DIV/0!	#DIV/0!					45	0.0442063	0.00500383
	Sup	#DIV/0!	#DIV/0!					Sup	0.683677	0.0487448
	Mass Balance	#DIV/0!	#DIV/0!					Mass Balance	0.727883	0.0535917
Psf Calculation							Endothelial Permeability (Pe) Calculation
Time (min)	Filter n° 1	Filter n° 2	Filter n° 3	Mean	SD		Time (min)	Filter n° 1	Filter n° 2	Filter n° 3	Mean	SD
0	0	0	0	0	0		0	0	0	0	0	0
10	0	0	0	0	0		10	3.93682	3.45733	3.34173	3.57863	0.315543
25	0	0	0	0	0		25	12.6237	12.4697	10.1949	11.7628	1.35997
45	0	0	0	0	0		45	23.9888	25.3388	20.0773	23.135	2.73268
Slope	0	0	0				Slope	0.542149	0.574995	0.451731	0.522958	0.0638337
Psf	/	/	/	1.16	0.15		Pst	0.542149	0.574995	0.451731	0.522958	0.0638337
							Psf	1.16	1.16	1.16	1.16	0
							1/Psf	0.862069	0.862069	0.862069	0.862069	0
							Pse	1.01787	1.14015	0.739842	0.965955	0.205142
							Pe	0.908814	1.01799	0.660573	0.86246	0.183163

[truncated: 1 more sheets: Summary]
